# Supplementary material for: YM155 exerts potent cytotoxic activity against quiescent (G0/G1) multiple myeloma and bortezomib resistant cells via inhibition of survivin and Mcl-1
Source: PubMed Central journal article supplement (PMC5762341; doi:10.18632/oncotarget.22871), 2017-12-04
Supplement: oncotarget-08-111535-s001.pdf [file oncotarget-08-111535-s001.pdf]

**YM155 exerts potent cytotoxic activity against quiescent ( $G_0/G_1$ ) multiple myeloma and bortezomib resistant cells *via* inhibition of survivin and Mcl-1**

**SUPPLEMENTARY MATERIALS**

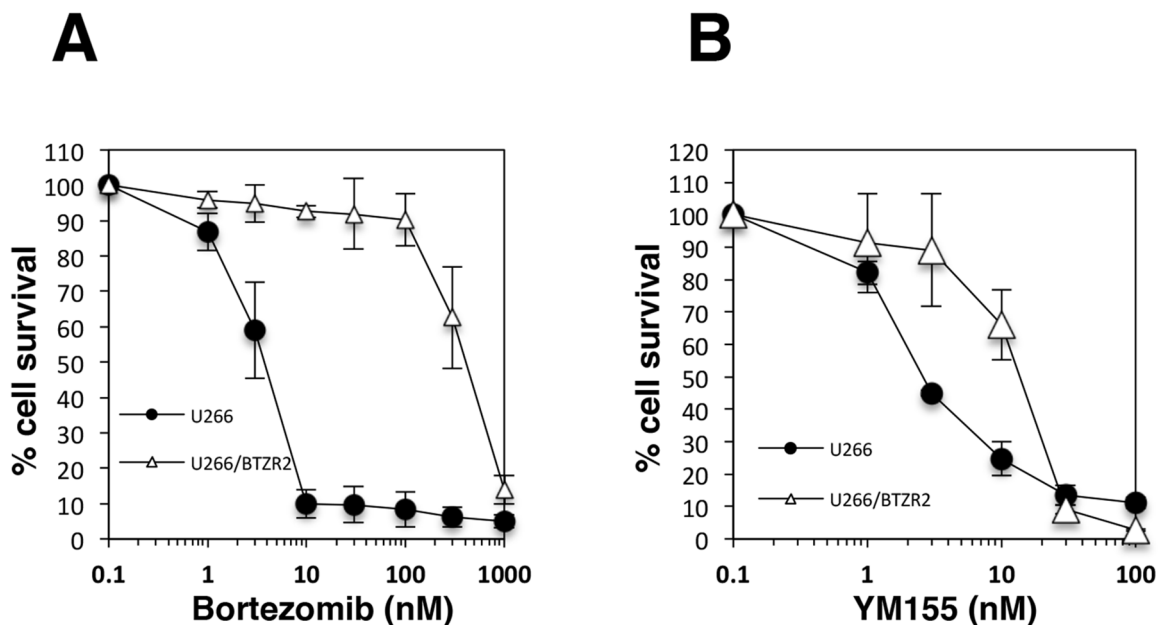

**Supplementary Figure 1: Cell growth inhibition by YM155 in U266 or U266/BTZR2 cells.** The cells were incubated with various concentrations of bortezomib (A) or YM155 (B) at 37°C for 72 h. Cell growth inhibition rate was determined by Cell counting Kit as described in Materials and Methods.

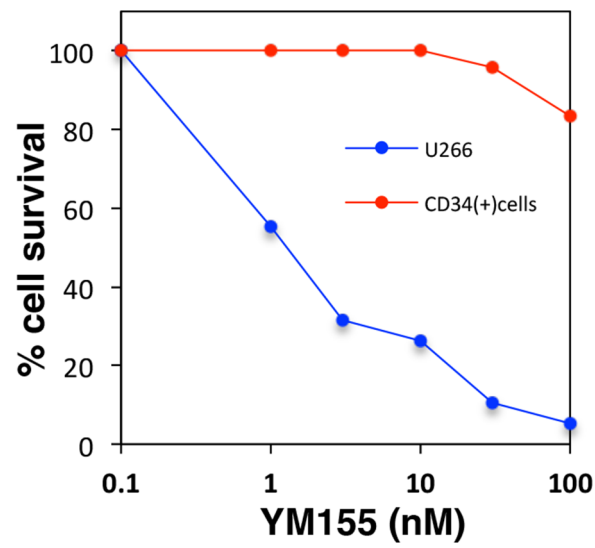

**Supplementary Figure 2: Effect of YM155 on the growth of human normal CD34 (+) cells.** CD34 (+) cells were incubated with various concentrations of YM155 at 37°C for 72 h. Cell growth inhibition rate was determined by trypan blue dye exclusion assay.
